# Supplementary material
Source: PubMed Central journal article supplement (PMC1994262)

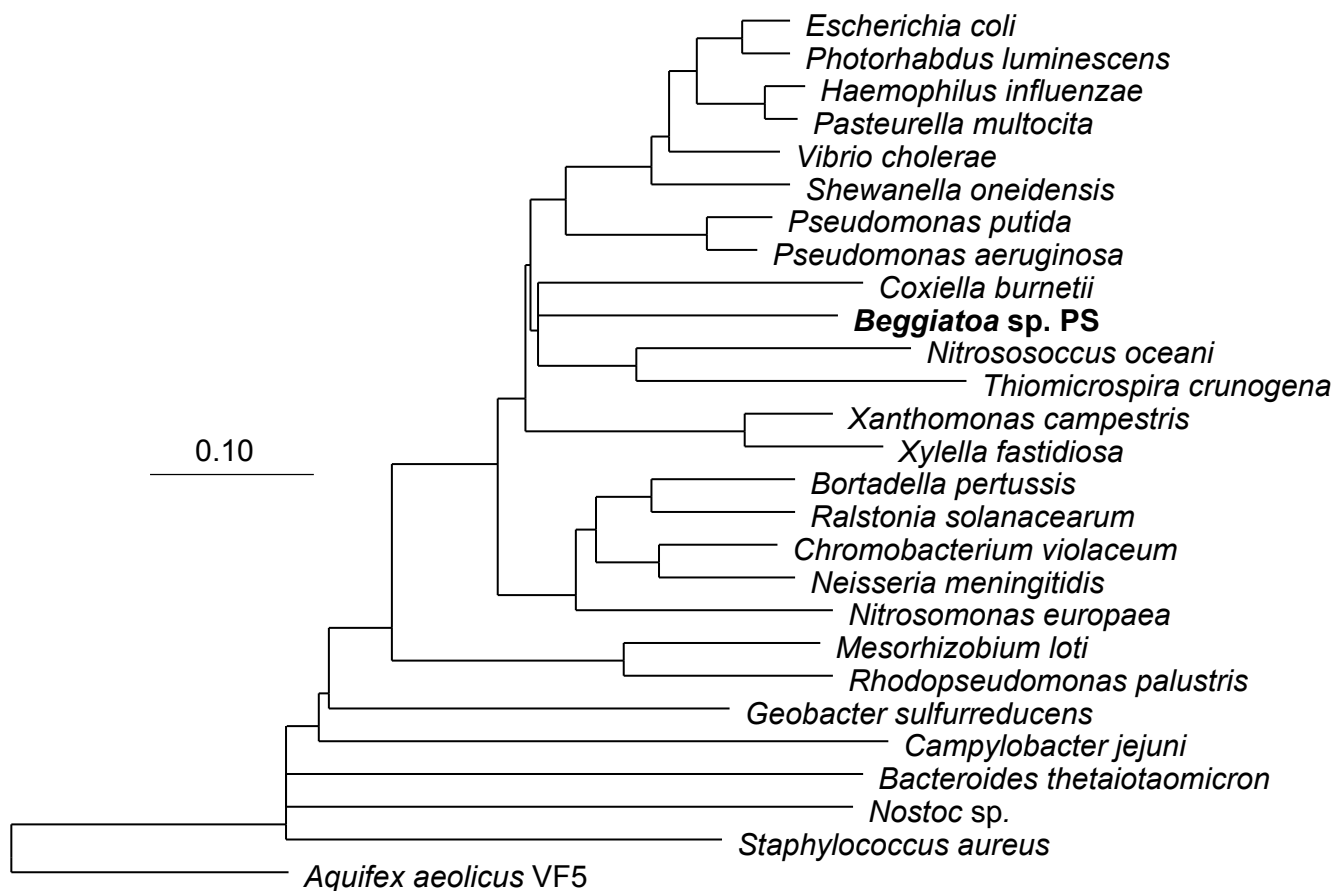

Supplement: pbio.0050230.sg002.pdf [file pbio.0050230.sg002.pdf]

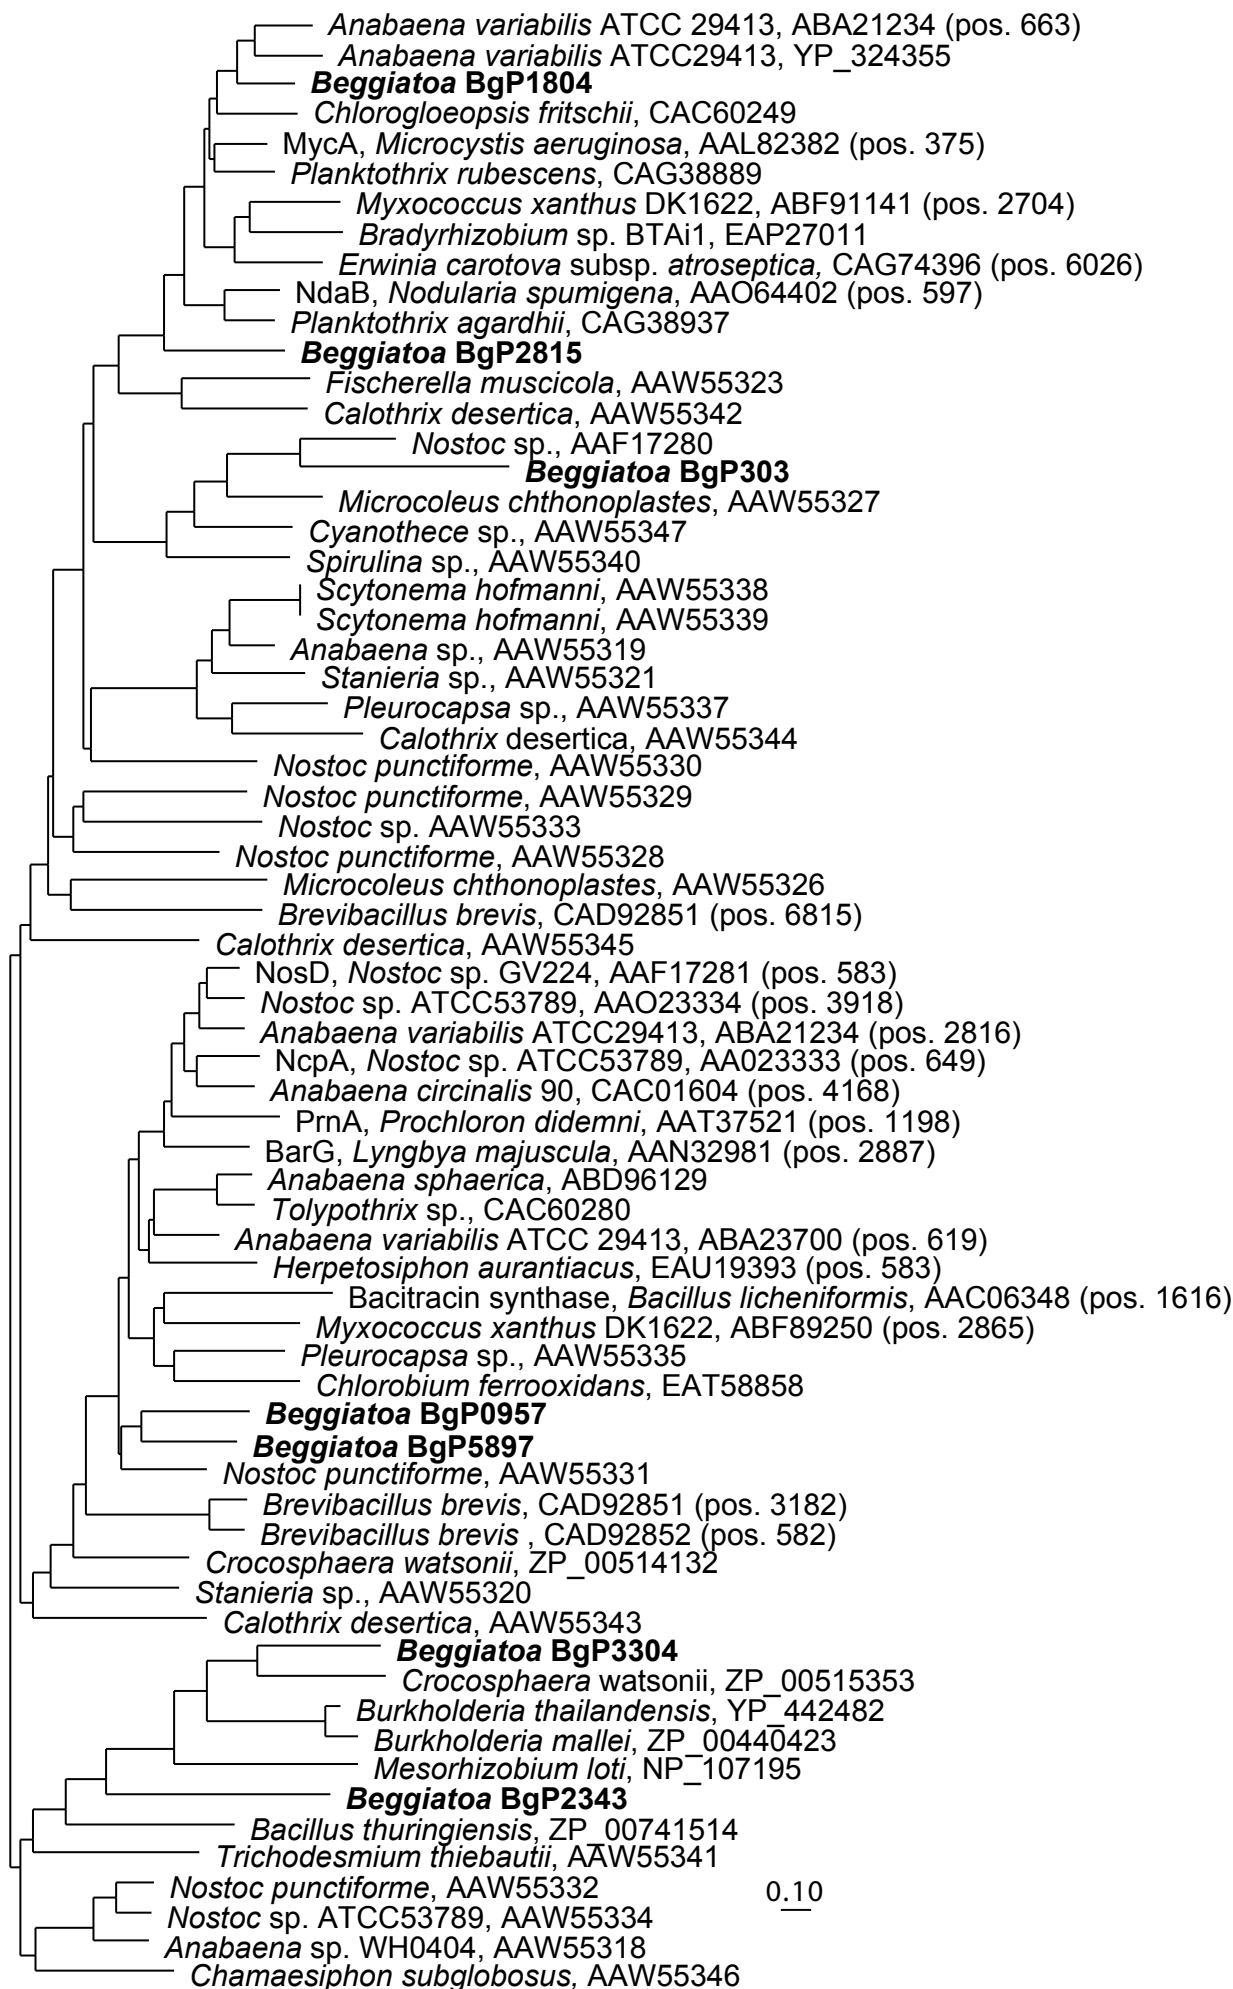

Supplement: pbio.0050230.sg004.pdf [file pbio.0050230.sg004.pdf]

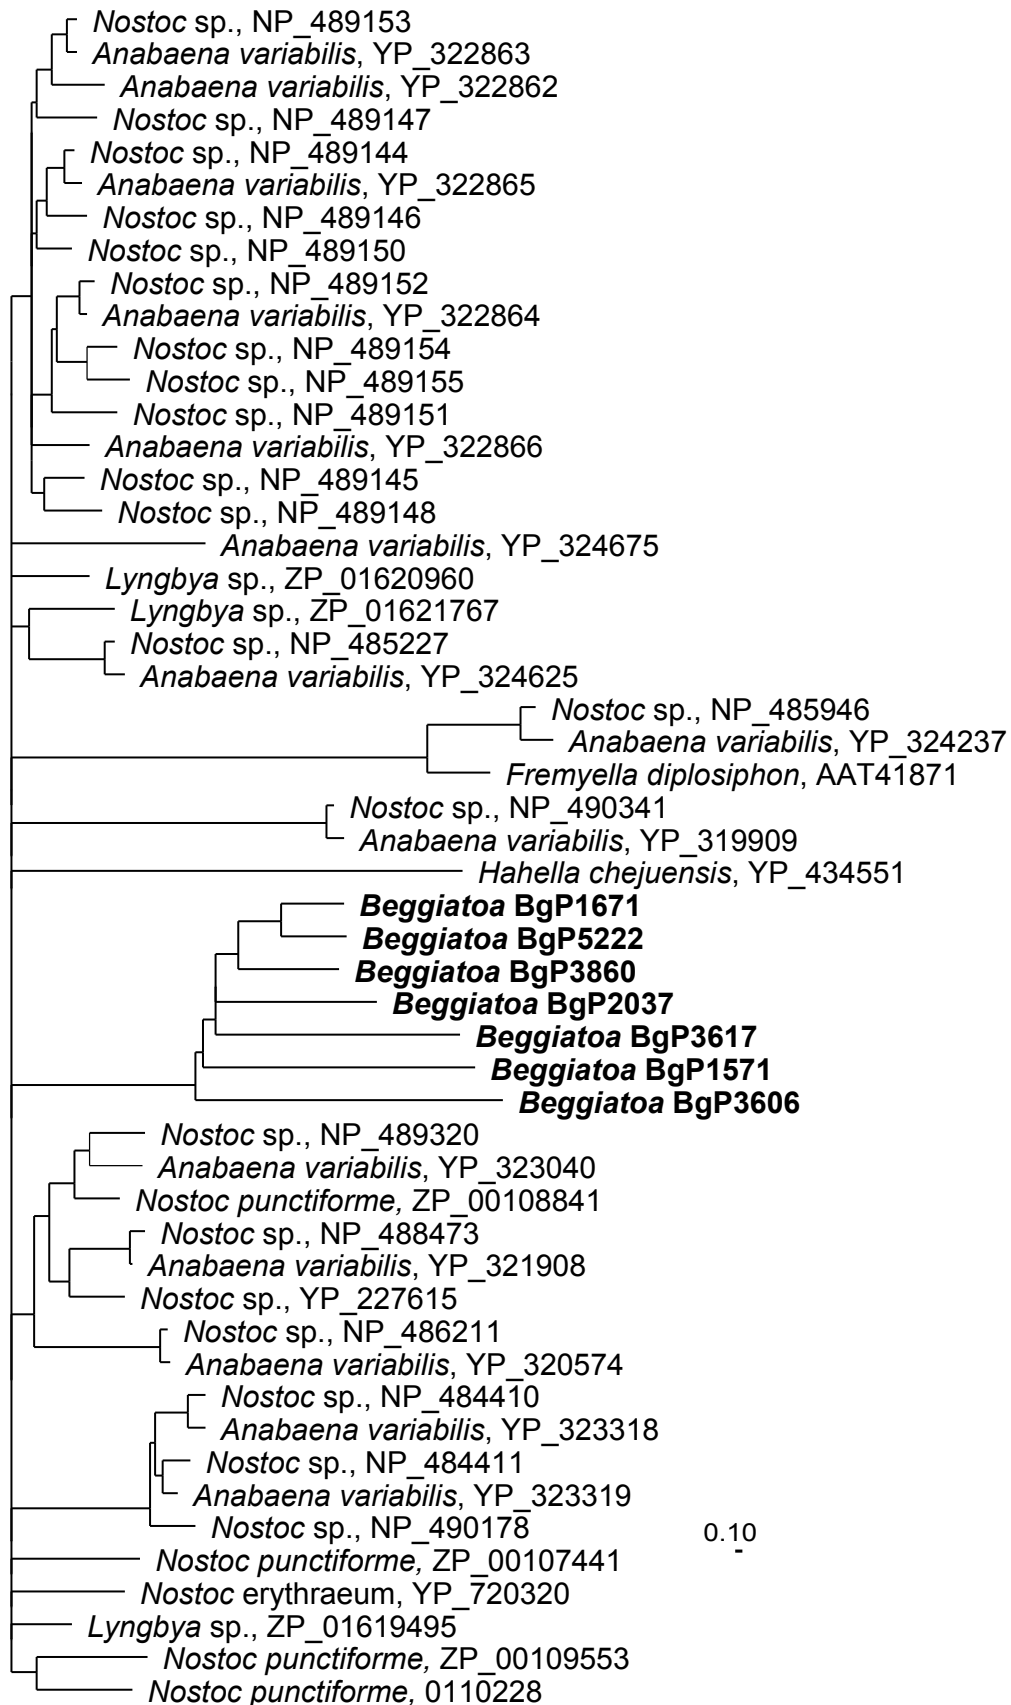

Supplement: pbio.0050230.sg005.pdf [file pbio.0050230.sg005.pdf]

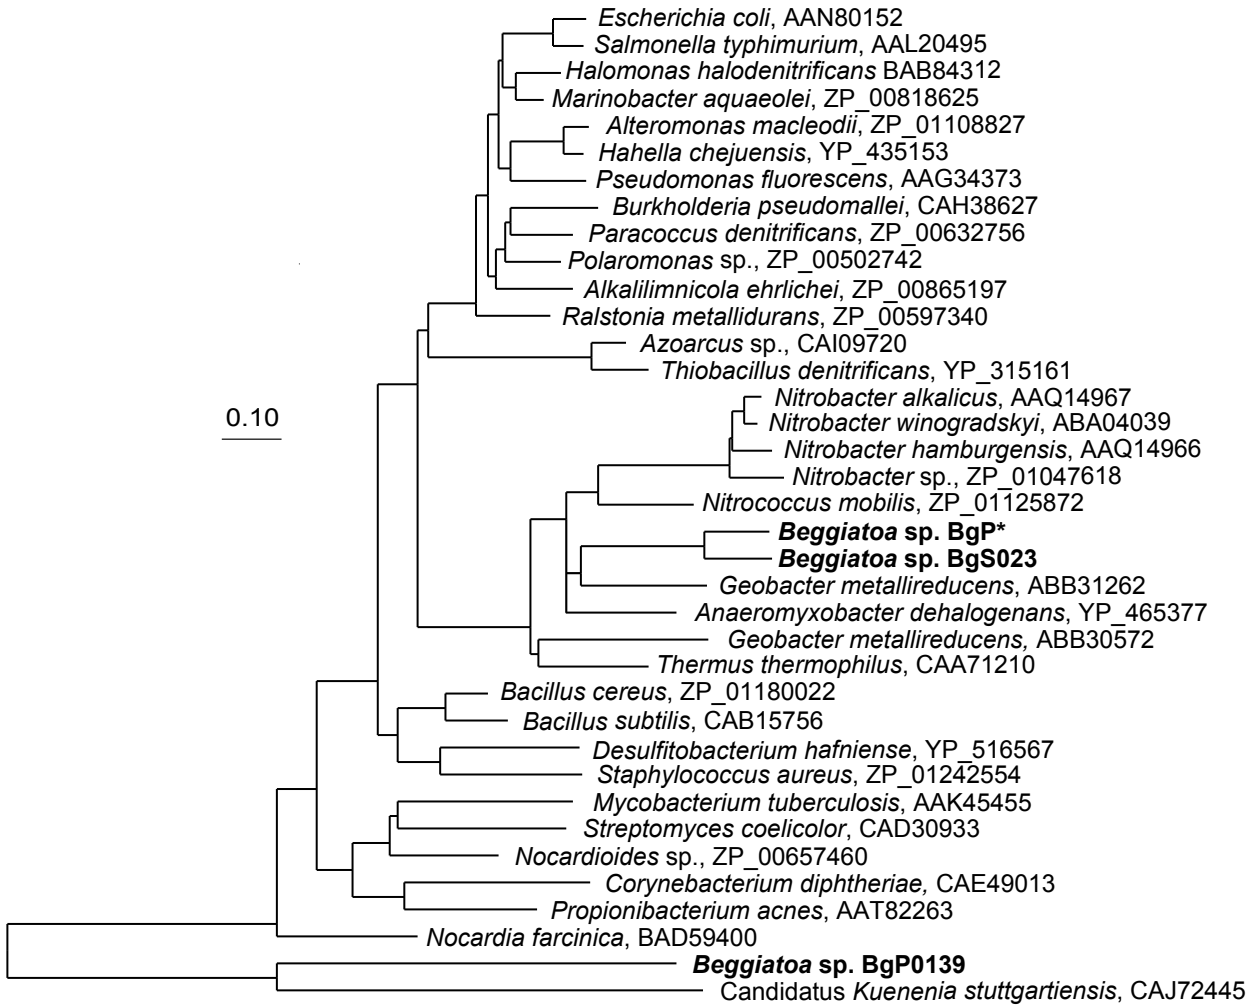

Supplement: pbio.0050230.sg006.pdf [file pbio.0050230.sg006.pdf]
